# Supplementary material for: Deglacial carbon cycle changes observed in a compilation of 127 benthic δ 13 C time series (20–6 ka)
Source: Copernicus journal article supplement (doi:10.5194/cp-14-1229-2018), 2018-08-16
Supplement: Supplementary file 2 [file cp-14-1229-2018-supplement.zip]

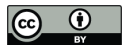

## *Supplement of*

# **Deglacial carbon cycle changes observed in a compilation of 127 benthic $\delta^{13}\text{C}$ time series (20–6 ka)**

**Carlye D. Peterson and Lorraine E. Lisiecki**

*Correspondence to:* Carlye D. Peterson (carlye.peterson@gmail.com)

- cp-14-1229-2018-supplement-title-page.pdf
- \_\_MACOSX
  - .\_stacks\_supplement\_127
  - stacks\_supplement\_127
    - \* .\_DS\_Store
    - \* .\_1\_age-depth-d13C\_files
    - \* .\_2\_d13c\_127records\_alignedSL14
    - \* .\_3\_regional\_d13C\_stacks
    - \* .\_4\_volume-weighted\_d13C\_stacks
    - \* .\_5\_deglacial\_animation
    - \* .\_README\_d13c\_files.txt
    - \* .\_data\_sources.csv
    - \* .\_data\_sources.xlsx
    - \* .\_ \$Table\_A1.xlsx
    - \* 1\_age-depth-d13C\_files
    - \* 2\_d13c\_127records\_alignedSL14
    - \* 3\_regional\_d13C\_stacks
    - \* 4\_volume-weighted\_d13C\_stacks
    - \* 5\_deglacial\_animation
- stacks\_supplement\_127
  - .DS\_Store
  - 1\_age-depth-d13C\_files
    - \* DI\_sites.csv
    - \* DI\_sites.xlsx
    - \* DP\_sites.csv
    - \* DP\_sites.xlsx

- \* DSA\_sites.csv
- \* DSA\_sites.xlsx
- \* II\_sites.csv
- \* II\_sites.xlsx
- \* INA\_sites.csv
- \* INA\_sites.xlsx
- \* IP\_sites.csv
- \* IP\_sites.xlsx
- \* ISA\_sites.csv
- \* ISA\_sites.xlsx
- \* LDNA\_sites.csv
- \* LDNA\_sites.xlsx
- \* README\_d13c\_sites.txt
- \* UDNA\_sites.csv
- \* UDNA\_sites.xlsx
- 2\_d13c\_127records\_alignedSL14
  - \* 20to6ka127.mat
  - \* README\_aligned\_d13c.txt
  - \* aligned\_d13c\_by\_region.xlsx
  - \* di\_d13c.txt
  - \* dp\_d13c.txt
  - \* dsa\_d13c.txt
  - \* ii\_d13c.txt
  - \* ina\_d13c.txt
  - \* ip\_d13c.txt
  - \* isa\_d13c.txt
  - \* ldna\_d13c.txt
  - \* udna\_d13c.txt
- 3\_regional\_d13C\_stacks
  - \* README\_region\_d13c\_stacks.txt
  - \* regional\_d13c\_stacks.csv
  - \* regional\_d13c\_stacks.xlsx
- 4\_volume-weighted\_d13C\_stacks
  - \* README\_volume\_weighted\_d13c\_stacks.txt
  - \* volume\_weighted\_d13c\_stacks.csv
  - \* volume\_weighted\_d13c\_stacks.xlsx
  - \* \$volume\_weighted\_d13c\_stacks.xlsx
- 5\_deglacial\_animation
  - \* .DS\_Store
  - \* README\_deg\_animation.txt
  - \* deglacial\_127\_d13C\_20-6\_24-Jul-2018.gif
  - \* deglacial\_d13C\_20-6ka\_23-Jul-2018.mov
- Fig.S1.pdf
- README\_d13c\_files.txt
- TableS1.csv
- TableS1.xlsx

The copyright of individual parts of the supplement might differ from the CC BY 4.0 License.
